# Supplementary material for: Association of Exposure to Abuse, Nurture, and Household Organization in Childhood With 4 Cardiovascular Disease Risks Factors Among Participants in the CARDIA Study
Source: PubMed Central journal article supplement — J Am Heart Assoc. 2022 Apr 27;11(9):e023244. doi: 10.1161/JAHA.121.023244 (PMC9238582; doi:10.1161/jaha.121.023244), 2022-04-27
Supplement: JAH3-11-e023244-s001.pdf [file JAH3-11-e023244-s001.pdf]

# **SUPPLEMENTAL MATERIAL**

**Table S1. Multivariate Adjusted Hazard Ratios and 95% Confidence Intervals of Cardiovascular Disease Risk Factors associated with Exposure to Abuse in Childhood, by Race and Sex.**

|                                  | White Race         |                    | Black Race         |                    |
|----------------------------------|--------------------|--------------------|--------------------|--------------------|
|                                  | White Male         | White Female       | Black Male         | Black Female       |
|                                  | <i>HR (95% CI)</i> | <i>HR (95% CI)</i> | <i>HR (95% CI)</i> | <i>HR (95% CI)</i> |
| <b>Type 2 Diabetes Mellitus*</b> |                    |                    |                    |                    |
| No abuse                         | Ref.               | Ref.               | Ref.               | Ref.               |
| Low Abuse                        | 0.85 (0.53, 1.35)  | 0.86 (0.55, 1.36)  | 1.23 (0.84, 1.79)  | 1.03 (0.75, 1.40)  |
| Occasional/Frequent abuse        | 1.92 (1.12, 3.29)  | 0.97 (0.54, 1.73)  | 1.02 (0.57, 1.83)  | 1.12 (0.76, 1.65)  |
| <b>Hypertension*</b>             |                    |                    |                    |                    |
| No abuse                         | Ref.               | Ref.               | Ref.               | Ref.               |
| Low Abuse                        | 0.88 (0.68, 1.15)  | 0.80 (0.60, 1.08)  | 1.23 (0.99, 1.53)  | 0.98 (0.81, 1.19)  |
| Occasional/Frequent abuse        | 0.94 (0.64, 1.39)  | 1.01 (0.70, 1.44)  | 0.80 (0.55, 1.18)  | 1.04 (0.81, 1.33)  |
| <b>Abdominal Obesity*</b>        |                    |                    |                    |                    |
| No abuse                         | Ref.               | Ref.               | Ref.               | Ref.               |
| Low Abuse                        | 1.05 (0.87, 1.27)  | 1.05 (0.86, 1.27)  | 0.98 (0.79, 1.21)  | 1.13 (0.94, 1.36)  |
| Occasional/Frequent abuse        | 0.70 (0.50, 0.96)  | 1.18 (0.92, 1.51)  | 0.91 (0.63, 1.30)  | 1.04 (0.81, 1.34)  |

HR, Hazard Ratio; CI, Confidence Interval

\*Incident obesity events examined from baseline (year 0 [1985-1986]) to year 30 (2015-2016).

† Models adjusted for age, study site, participant's years of education and average years of parental years of education at baseline

**Table S2. Missing values for each outcome examined.**

|                                           | <b>Obesity</b> | <b>Type 2 Diabetes Mellitus</b> | <b>Hypertension</b> | <b>Hyperlipidemia</b> | <b>Abdominal Adiposity</b> |
|-------------------------------------------|----------------|---------------------------------|---------------------|-----------------------|----------------------------|
| Final Analytic Sample                     | 3208           | 3492                            | 3458                | 2973                  | 3034                       |
| Age (years)                               | 0              | 0                               | 0                   | 0                     | 0                          |
| Study Center                              | 0              | 0                               | 0                   | 0                     | 0                          |
| Participant's years of education          | 1              | 1                               | 1                   | 1                     | 1                          |
| Parental years of education               | 167            | 193                             | 196                 | 168                   | 157                        |
| Body mass index (BMI, kg/m <sup>2</sup> ) | 0              | 12                              | 11                  | 9                     | 2                          |

Missing values for each variable were imputed using multiple imputation by chained equations.
